# Supplementary material for: Evaluation of the Effect of Pb Pollution on Avian Influenza Virus-Specific Antibody Production in Black-Headed Gulls (Chroicocephalus ridibundus)
Source: MDPI journal article supplement (doi:10.3390/ani13142338), 2023-07-18
Supplement: s1 [file s1]

Supplementary Table S1. Virus strains used in neutralization tests.

| HA protein | Virus strains                        |
|------------|--------------------------------------|
| H1         | A/swine/Iowa/15/1930 (H1N1)          |
| H2         | A/Singapore/1/1957 (H2N2)            |
| H3         | A/duck/Ukraine/1/1963 (H3N8)         |
| H4         | A/duck/Czechoslovakia/1956 (H4N6)    |
| H5         | A/duck/Hokkaido/Vac-3/2007 (H5N1)    |
| H6         | A/duck/Hong Kong/960/1980 (H6N2)     |
| H7         | A/seal/Massachusetts/1/1980 (H7N7)   |
| H8         | A/turkey/Ontario/6118/1968 (H8N4)    |
| H9         | A/duck/Hokkaido/49/1998 (H9N2)       |
| H10        | A/chicken/Germany/N/1949 (H10n7)     |
| H11        | A/duck/England/1/1956 (H11N6)        |
| H12        | A/duck/Alberta/60/1976 (H12N5)       |
| H13        | A/gull/Maryland/704/1977 (H13N6)     |
| H14        | A/mallard/Astrakhan/263/1982 (H14N5) |
| H15        | A/duck/Australia/341/1983 (H15N8)    |
| H16        | A/duck/Hokkaido/WZ82/2013 (H16N3)    |
