# Supplementary material for: Evaluation of the Effect of Pb Pollution on Avian Influenza Virus-Specific Antibody Production in Black-Headed Gulls (Chroicocephalus ridibundus)
Source: MDPI journal article supplement (doi:10.3390/ani13142338), 2023-07-18
Supplement: s1 [file s1]

1 Supplementary Table S2. The datasets analyzed for this study.

| <b>Sample<br/>number</b> | <b>Populations</b> | <b>Periods</b> | <b>Age</b> | <b>Sex</b> | <b>BW (g)</b> | <b>Pb<br/>(µg/dL)</b> | <b>Infection<br/>history</b> | <b>Antibody<br/>titer (OD)</b> |
|--------------------------|--------------------|----------------|------------|------------|---------------|-----------------------|------------------------------|--------------------------------|
| 1                        | TBP                | Wi             | Ad         | F          | 297.0         | 2.00                  | N                            | 0.16                           |
| 2                        | TBP                | Wi             | Ad         | F          | 242.0         | 0.67                  | N                            | 0.54                           |
| 3                        | TBP                | Wi             | Ad         | F          | 250.0         | 1.09                  | P                            | 0.81                           |
| 4                        | TBP                | Wi             | Ad         | F          | 274.0         | 4.03                  | N                            | 0.40                           |
| 5                        | TBP                | Wi             | Ad         | M          | 324.0         | 0.42                  | N                            | 0.23                           |
| 6                        | TBP                | Wi             | Ad         | F          | 220.0         | 0.71                  | P                            | 1.28                           |
| 7                        | TBP                | Wi             | Ad         | M          | 273.0         | 12.05                 | N                            | 0.36                           |
| 8                        | TBP                | Wi             | Ad         | F          | 268.0         | 4.00                  | P                            | 0.75                           |
| 9                        | TBP                | Wi             | Ad         | F          | 261.0         | 0.50                  | P                            | 1.07                           |
| 10                       | TBP                | Wi             | Ad         | F          | 273.0         | 0.31                  | P                            | 1.37                           |
| 11                       | TBP                | Wi             | Ad         | F          | 236.5         | 3.34                  | P                            | 0.81                           |
| 12                       | TBP                | Av             | Ad         | M          | 280.0         | 0.84                  | N                            | 0.21                           |
| 13                       | TBP                | Wi             | Ad         | F          | 300.0         | 1.00                  | P                            | 1.34                           |
| 14                       | TBP                | Wi             | Ad         | M          | 303.0         | 1.00                  | P                            | 0.64                           |
| 15                       | TBP                | Wi             | Ad         | M          | 320.0         | 2.00                  | N                            | 0.22                           |
| 16                       | TBP                | Wi             | Ad         | M          | 304.0         | 2.00                  | N                            | 0.25                           |
| 17                       | TBP                | Wi             | Ad         | F          | 294.0         | 1.00                  | P                            | 0.87                           |
| 18                       | TBP                | Wi             | Ad         | F          | 338.0         | 7.39                  | P                            | 0.62                           |
| 19                       | TBP                | Wi             | Ad         | F          | 281.0         | 2.00                  | P                            | 1.66                           |
| 20                       | TBP                | Wi             | Ad         | F          | 245.0         | 8.00                  | N                            | 0.49                           |
| 21                       | TBP                | Av             | Ad         | M          | 281.0         | 2.00                  | N                            | 0.12                           |
| 22                       | TBP                | Wi             | Ad         | F          | 302.6         | 2.00                  | P                            | 0.99                           |
| 23                       | TBP                | Wi             | Ad         | M          | 288.0         | 1.00                  | P                            | 1.28                           |
| 24                       | TBP                | Wi             | Ad         | M          | 316.3         | 2.56                  | N                            | 0.46                           |
| 25                       | TBP                | Wi             | Ad         | M          | 335.0         | 21.23                 | P                            | 0.67                           |
| 26                       | TBP                | Wi             | Ad         | M          | 315.0         | 3.08                  | N                            | 0.47                           |
| 27                       | TBP                | Av             | Ad         | M          | 270.0         | 1.07                  | N                            | 0.35                           |
| 28                       | TBP                | Av             | Ad         | F          | 275.0         | 0.55                  | P                            | 1.63                           |
| 29                       | TBP                | Wi             | Ad         | M          | 291.0         | 1.00                  | P                            | 1.40                           |
| 30                       | TBP                | Wi             | Ad         | F          | 365.5         | 2.00                  | P                            | 0.67                           |

|    |     |    |    |   |       |       |   |      |
|----|-----|----|----|---|-------|-------|---|------|
| 31 | TBP | Wi | Ad | F | 278.5 | 8.67  | P | 0.99 |
| 32 | TBP | Wi | Ad | M | 245.7 | 1.00  | P | 0.62 |
| 33 | TBP | Wi | Y  | F | 211.8 | 1.10  | N | 0.43 |
| 34 | TBP | Wi | Ad | F | 277.3 | 2.00  | N | 0.50 |
| 35 | TBP | Wi | Ad | F | 268.3 | 8.68  | N | 0.60 |
| 36 | TBP | Wi | Ad | M | 303.9 | 2.00  | N | 0.51 |
| 37 | TBP | Wi | Ad | F | 280.0 | 2.00  | N | 0.39 |
| 38 | TBP | Wi | Ad | M | 289.4 | 1.00  | P | 0.67 |
| 39 | TBP | Av | Ad | M | 289.0 | 0.27  | N | 0.40 |
| 40 | TBP | Wi | Ad | M | 255.0 | 4.97  | N | 0.39 |
| 41 | TBP | Wi | Ad | F | 281.0 | 0.33  | P | 1.41 |
| 42 | TBP | Wi | Ad | F | 190.0 | 1.43  | P | 1.89 |
| 43 | TBP | Wi | Ad | M | 296.0 | 0.85  | P | 1.50 |
| 44 | TBP | Av | Ad | M | 290.0 | 0.22  | P | 2.05 |
| 45 | TBP | Wi | Ad | M | 285.7 | 2.57  | N | 0.58 |
| 46 | TBP | Wi | Ad | M | 336.0 | 1.00  | P | 0.91 |
| 47 | TBP | Wi | Ad | M | 302.0 | 2.00  | N | 0.26 |
| 48 | TBP | Av | Ad | M | 276.0 | 0.42  | N | 0.33 |
| 49 | TBP | Wi | Y  | F | 254.0 | 1.26  | N | 0.37 |
| 50 | TBP | Wi | Ad | M | 327.0 | 2.00  | P | 0.95 |
| 51 | TBP | Wi | Ad | M | 298.5 | 1.00  | P | 0.89 |
| 52 | TBP | Wi | Ad | F | 261.3 | 2.00  | P | 0.78 |
| 53 | TBP | Wi | Ad | M | 335.7 | 2.00  | P | 0.68 |
| 54 | TBP | Wi | Ad | F | 256.4 | 3.96  | P | 0.65 |
| 55 | TBP | Wi | Ad | M | 295.6 | 1.00  | N | 0.45 |
| 56 | TBP | Wi | Ad | M | 255.0 | 12.82 | P | 0.79 |
| 57 | TBP | Wi | Ad | M | 338.5 | 1.00  | P | 0.66 |
| 58 | TBP | Wi | Ad | M | 331.0 | 4.03  | P | 0.64 |
| 59 | TBP | Wi | Ad | M | 341.0 | 2.00  | P | 0.85 |
| 60 | TBP | Wi | Ad | M | 279.5 | 2.68  | N | 0.52 |
| 61 | TBP | Wi | Ad | F | 263.0 | 7.00  | N | 0.34 |
| 62 | TBP | Wi | Ad | F | 302.4 | 1.00  | P | 0.99 |
| 63 | TBP | Wi | Ad | F | 266.0 | 5.38  | P | 0.66 |

|    |     |    |    |   |       |       |   |      |
|----|-----|----|----|---|-------|-------|---|------|
| 64 | TBP | Wi | Ad | M | 282.0 | 1.00  | N | 0.52 |
| 65 | TBP | Wi | Ad | F | 266.6 | 0.94  | N | 0.12 |
| 66 | TBP | Wi | Ad | M | 289.0 | 2.00  | N | 0.18 |
| 67 | TBP | Wi | Ad | F | 269.0 | 1.87  | N | 0.51 |
| 68 | TBP | Wi | Ad | M | 315.0 | 1.23  | N | 0.34 |
| 69 | TBP | Av | Ad | F | 286.0 | 1.08  | N | 0.12 |
| 70 | TBP | Wi | Ad | F | 302.0 | 26.05 | N | 0.54 |
| 71 | TBP | Wi | Ad | M | 310.0 | 2.51  | P | 0.58 |
| 72 | TBP | Wi | Ad | M | 309.0 | 2.00  | N | 0.19 |
| 73 | TBP | Wi | Ad | F | 278.0 | 10.72 | N | 0.39 |
| 74 | TBP | Wi | Ad | F | 256.0 | 2.00  | P | 0.39 |
| 75 | TBP | Wi | Ad | F | 262.0 | 8.91  | P | 0.63 |
| 76 | TBP | Wi | Ad | F | 287.0 | 8.83  | N | 0.20 |
| 77 | TBP | Wi | Ad | F | 320.0 | 2.31  | P | 1.64 |
| 78 | TBP | Av | Ad | M | 277.0 | 2.00  | N | 0.16 |
| 79 | TBP | Wi | Ad | M | 344.0 | 1.39  | N | 0.27 |
| 80 | TBP | Wi | Ad | F | 283.0 | 2.00  | P | 0.81 |
| 81 | TBP | Wi | Ad | M | 280.0 | 17.37 | P | 0.72 |
| 82 | TBP | Wi | Ad | M | 345.0 | 2.00  | P | 0.87 |
| 83 | TBP | Wi | Ad | M | 292.0 | 15.66 | P | 1.00 |
| 84 | TBP | Av | Ad | M | 295.0 | 0.28  | N | 0.31 |
| 85 | TBP | Av | Ad | M | 244.0 | 0.93  | P | 0.91 |
| 86 | TBP | Av | Ad | F | 263.0 | 2.00  | P | 0.93 |
| 87 | TBP | Av | Ad | F | 288.0 | 1.00  | P | 1.11 |
| 88 | TBP | Av | Ad | F | 273.0 | 0.57  | N | 0.16 |
| 89 | TBP | Wi | Y  | F | 234.8 | 3.50  | N | 0.17 |
| 90 | TBP | Av | Ad | F | 227.0 | 0.60  | N | 0.51 |
| 91 | TBP | Av | Ad | M | 255.0 | 1.01  | P | 1.12 |
| 92 | TBP | Wi | Ad | F | 265.0 | 1.00  | P | 0.96 |
| 93 | TBP | Wi | Ad | M | 304.0 | 2.00  | P | 0.98 |
| 94 | TBP | Wi | Ad | F | 276.0 | 10.81 | N | 0.56 |
| 95 | TBP | Wi | Ad | F | 282.0 | 1.00  | P | 1.70 |
| 96 | TBP | Wi | Ad | F | 296.0 | 15.98 | N | 0.32 |

|     |     |    |    |   |       |       |   |      |
|-----|-----|----|----|---|-------|-------|---|------|
| 97  | TBP | Wi | Ad | M | 307.0 | 8.38  | P | 1.99 |
| 98  | TBP | Wi | Ad | M | 314.0 | 2.27  | N | 0.19 |
| 99  | TBP | Wi | Y  | F | 292.0 | 0.80  | N | 0.51 |
| 100 | TBP | Av | Ad | F | 249.0 | 0.61  | N | 0.10 |
| 101 | TBP | Wi | Ad | F | 303.0 | 2.00  | P | 0.93 |
| 102 | TBP | Wi | Ad | M | 327.0 | 3.15  | P | 0.74 |
| 103 | TBP | Wi | Ad | F | 248.0 | 7.39  | N | 0.29 |
| 104 | TBP | Av | Ad | M | 301.0 | 0.24  | N | 0.27 |
| 105 | TBP | Av | Ad | F | 254.0 | 1.00  | N | 0.26 |
| 106 | TBP | Av | Ad | F | 280.0 | 0.74  | N | 0.41 |
| 107 | TBP | Av | Ad | M | 260.0 | 0.23  | N | 0.15 |
| 108 | TBP | Wi | Ad | M | 287.0 | 0.42  | N | 0.45 |
| 109 | TBP | Av | Ad | F | 276.0 | 1.00  | P | 1.44 |
| 110 | TBP | Av | Ad | M | 227.0 | 0.33  | P | 1.29 |
| 111 | TBP | Av | Ad | M | 278.0 | 0.18  | N | 0.30 |
| 112 | TBP | Av | Ad | M | 280.0 | 0.24  | N | 0.25 |
| 113 | TBP | Av | Ad | F | 275.0 | 0.40  | N | 0.22 |
| 114 | TBP | Av | Ad | M | 261.0 | 1.19  | N | 0.33 |
| 115 | TBP | Av | Ad | M | 278.0 | 8.86  | P | 0.54 |
| 116 | TBP | Av | Ad | F | 290.0 | 1.00  | P | 1.17 |
| 117 | TBP | Av | Ad | F | 272.0 | 0.26  | N | 0.29 |
| 118 | TBP | Wi | Ad | M | 329.0 | 0.53  | P | 1.76 |
| 119 | MBP | Wi | Ad | F | 276.9 | 12.62 | N | 0.33 |
| 120 | MBP | Wi | Ad | F | 301.0 | 3.50  | N | 0.43 |
| 121 | MBP | Wi | Ad | F | 222.1 | 4.99  | P | 0.75 |
| 122 | MBP | Wi | Ad | M | 288.0 | 2.00  | P | 1.08 |
| 123 | MBP | Wi | Y  | M | 230.2 | 1.03  | P | 1.38 |
| 124 | MBP | Wi | Ad | F | 279.0 | 1.60  | N | 0.21 |
| 125 | MBP | Wi | Y  | M | 274.8 | 3.00  | P | 0.69 |
| 126 | MBP | Wi | Ad | F | 263.0 | 1.70  | P | 0.74 |
| 127 | MBP | Wi | Ad | F | 276.0 | 4.60  | P | 0.61 |
| 128 | MBP | Wi | Y  | M | 358.0 | 1.00  | N | 0.46 |
| 129 | MBP | Wi | Ad | F | 276.0 | 1.97  | P | 1.10 |

|     |     |    |    |   |       |       |   |      |
|-----|-----|----|----|---|-------|-------|---|------|
| 130 | MBP | Wi | Ad | M | 339.0 | 0.91  | P | 2.23 |
| 131 | MBP | Av | Ad | M | 313.0 | 1.30  | N | 0.52 |
| 132 | MBP | Av | Ad | F | 240.8 | 31.60 | P | 0.92 |
| 133 | MBP | Av | Ad | M | 282.0 | 4.60  | N | 0.43 |
| 134 | MBP | Av | Ad | F | 275.0 | 4.50  | P | 0.73 |
| 135 | MBP | Wi | Ad | F | 236.3 | 1.97  | P | 0.79 |
| 136 | MBP | Wi | Ad | F | 255.5 | 11.93 | P | 0.62 |
| 137 | MBP | Wi | Ad | F | 278.5 | 1.00  | P | 1.01 |
| 138 | MBP | Wi | Ad | F | 254.0 | 1.00  | P | 1.04 |
| 139 | MBP | Wi | Ad | F | 347.0 | 3.50  | P | 0.63 |
| 140 | MBP | Wi | Ad | M | 315.5 | 0.91  | P | 3.41 |
| 141 | MBP | Wi | Ad | F | 245.7 | 2.44  | P | 1.29 |
| 142 | MBP | Wi | Ad | F | 254.4 | 12.00 | P | 0.84 |
| 143 | MBP | Av | Ad | F | 214.6 | 1.00  | P | 0.78 |
| 144 | MBP | Wi | Ad | M | 292.0 | 28.90 | P | 0.81 |
| 145 | MBP | Wi | Ad | F | 258.6 | 2.00  | P | 1.29 |
| 146 | MBP | Av | Ad | F | 255.3 | 1.00  | P | 1.30 |
| 147 | MBP | Wi | Ad | F | 275.0 | 1.00  | P | 1.16 |
| 148 | MBP | Wi | Ad | F | 278.8 | 1.50  | P | 1.02 |
| 149 | MBP | Wi | Ad | F | 247.6 | 5.52  | P | 1.32 |
| 150 | MBP | Wi | Ad | M | 303.5 | 1.00  | P | 1.12 |
| 151 | MBP | Av | Ad | F | 317.0 | 1.00  | P | 1.66 |
| 152 | MBP | Wi | Ad | M | 311.2 | 6.66  | P | 0.88 |
| 153 | MBP | Wi | Ad | F | 261.9 | 1.00  | P | 1.02 |
| 154 | MBP | Av | Ad | F | 253.6 | 6.20  | P | 0.70 |
| 155 | MBP | Wi | Ad | F | 268.1 | 2.73  | P | 1.86 |
| 156 | MBP | Wi | Ad | F | 233.0 | 1.00  | P | 1.19 |
| 157 | MBP | Wi | Ad | M | 334.0 | 4.80  | P | 1.33 |
| 158 | MBP | Wi | Ad | M | 296.0 | 2.00  | P | 0.96 |
| 159 | MBP | Wi | Ad | F | 294.0 | 1.00  | P | 1.13 |
| 160 | MBP | Wi | Ad | F | 290.5 | 1.90  | N | 0.47 |
| 161 | MBP | Wi | Y  | M | 358.0 | 2.38  | P | 1.34 |
| 162 | MBP | Wi | Y  | M | 280.0 | 6.52  | P | 1.10 |

|     |     |    |    |   |       |       |   |      |
|-----|-----|----|----|---|-------|-------|---|------|
| 163 | MBP | Wi | Y  | M | 236.0 | 8.00  | P | 1.54 |
| 164 | MBP | Av | Y  | F | 299.0 | 0.48  | P | 1.27 |
| 165 | MBP | Wi | Ad | F | 279.2 | 2.00  | N | 0.27 |
| 166 | MBP | Wi | Ad | F | 256.0 | 1.00  | P | 1.84 |
| 167 | MBP | Av | Ad | F | 267.5 | 1.00  | P | 2.67 |
| 168 | MBP | Av | Ad | M | 274.5 | 2.00  | P | 1.61 |
| 169 | MBP | Wi | Ad | F | 286.0 | 13.10 | P | 0.67 |
| 170 | MBP | Wi | Ad | F | 284.5 | 7.90  | P | 1.77 |

---

Annotation: populations (Tokyo Bay population: TBP, Mikawa Bay population: MBP), periods (Arriving: Av, Wintering: Wi), age (Yearling: Y, Adult: Ad), sex (Male: M, Female: F), BW: body weight, BLL: blood Pb level, and infection history (negative: N, positive: P), OD: optical density.

2  
3  
4
